# Supplementary material for: Composition tunable ternary Pt–Ni–Co octahedra for optimized oxygen reduction activity
Source: Royal Society of Chemistry journal article supplement (doi:10.1039/c6cc06165f), 2016-01-01
Supplement: c6cc06165f1.pdf [file c6cc06165f1.pdf]

## Supporting Information

### Composition Tunable Ternary Pt-Ni-Co Octahedra for Optimized Oxygen Reduction Activity

Zipeng Zhao,<sup>a†</sup> Miao Feng,<sup>ab†</sup> Jihan Zhou,<sup>c</sup> Zeyan Liu,<sup>a</sup> Mufan Li,<sup>e</sup> Zheng Fan,<sup>a</sup>  
Oshton Tsen,<sup>a</sup> Jianwei Miao,<sup>cd</sup> Xiangfeng Duan<sup>de</sup> and Yu Huang<sup>ad\*</sup>

<sup>a</sup> Department of Materials Science and Engineering, University of California, Los Angeles, California 90095, United States. E-mail: yhuang@seas.ucla.edu

<sup>b</sup> College of Materials Science and Engineering, Fuzhou University, Fuzhou, Fujian 350116, China.

<sup>c</sup> Department of Physics and Astronomy, University of California, Los Angeles, California 90095, United States.

<sup>d</sup> California Nanosystems Institute, University of California, Los Angeles, California 90095, United States.

<sup>e</sup> Department of Chemistry and Biochemistry, University of California, Los Angeles, California 90095, United States.

† Those authors contribute equally to this work.

## Materials

Platinum(II) acetylacetonate [Pt(acac)<sub>2</sub>, Pt 48.0% min], nickel(II) acetylacetonate [Ni(acac)<sub>2</sub>, 95%], cobalt(II) acetylacetonate [Co(acac)<sub>2</sub>, Crystalline], citric acid (> 99%), dicobalt octacarbonyl [Co<sub>2</sub>(CO)<sub>8</sub>, > 90%], tungsten hexacarbonyl [W(CO)<sub>6</sub>], Commercial Pt/C catalyst (20 wt% Pt, and particle size 2 to 5 nm) were purchased from Alfa Aesar. *N, N*-dimethylformamide (DMF, ≥99.8%), ethanol (200 proof) were obtained from EMD Millipore, and Decon, respectively. Acetone (≥99.5%) and isopropanol (≥99.5%) were purchased from Fisher Scientific. All reagents were used as received without further purification. Carbon black (Vulcan XC-72) was received from Carbot Corporation, and annealed (2 h/300 °C/air) before used. The deionized water (18 MΩ/cm) was obtained from an ultra-pure purification system (Milli-Q advantage A10).

## Synthesis of carbon-supported dispersive Pt-Ni-Co alloy nano octahedra

Highly dispersive Pt-Ni-Co octahedra on carbon black was prepared as following conditions: firstly, 10 mg of Pt(acac)<sub>2</sub>, 8 mg of Ni(acac)<sub>2</sub>, 1.5 mg of Co<sub>2</sub>(CO)<sub>8</sub>, 3 mg of Co(acac)<sub>2</sub> and 60 mg of citric acid were added to a 11 mL of carbon black suspended DMF solution (total 35 mg carbon black) in a 25 mL glass vial. The vial was then capped and ultrasonic processed for 5 minutes, followed by heating with magnetic stirring in an oil bath at 165 °C for 24 h. After being cooled to room temperature, the carbon supported dispersive Pt-Ni-Co alloy octahedra were obtained by centrifugation and washed with isopropanol/acetone mixture several times to remove the organic impurities and precursor residues. This synthesis yielded octahedral PtNi<sub>0.55</sub>Co<sub>0.1</sub>/C, which could be re-dispersed in ethanol for future application.

By changing the precursors' amount, we can tune the composition of alloy Pt-Ni-Co nano octahedra. First we tuned Pt:(Ni+Co) ratio by changing Pt:Ni precursor ratio while keeping Pt:Co precursor ratio the same (Table S1). Then we tuned Ni:Co composition ratio by replacing part of Ni(acac)<sub>2</sub> with Co(acac)<sub>2</sub> (Table S2). Detailed recipe was noted as following in Tables S1 and S2.

## Synthesis of PtNi<sub>0.9</sub>Co<sub>0.05</sub> octahedra

10 mg of Pt(acac)<sub>2</sub>, 15 mg of Ni(acac)<sub>2</sub>, 1.5 mg of Co<sub>2</sub>(CO)<sub>8</sub>, and 60 mg of citric acid were added to a 11 mL of carbon black suspended DMF solution (total 35 mg carbon black) in a 25 mL glass vial. The vial was then capped and ultrasonic processed for 5 minutes. The vial was then heated with magnetic stirring in an oil bath at 165 °C for 24 hrs. Post reaction process was kept the same as above noted typical method.

## Synthesis of PtNi<sub>0.6</sub>Co<sub>0.05</sub> octahedra

10 mg of Pt(acac)<sub>2</sub>, 9 mg of Ni(acac)<sub>2</sub>, 1.5 mg of Co<sub>2</sub>(CO)<sub>8</sub>, and 60 mg of citric acid were added to a 11 mL of carbon black suspended DMF solution (total 35 mg carbon black) in a 25 mL glass vial. The vial was then capped and ultrasonic processed for 5

minutes. The vial was then heated with magnetic stirring in an oil bath at 165 °C for 24 hrs. Post reaction process was kept the same as above noted typical method.

#### **Synthesis of PtNi<sub>0.4</sub>Co<sub>0.05</sub> octahedra**

10 mg of Pt(acac)<sub>2</sub>, 6 mg of Ni(acac)<sub>2</sub>, 1.5 mg of Co<sub>2</sub>(CO)<sub>8</sub>, and 60 mg of citric acid were added to a 11 mL of carbon black suspended DMF solution (total 35 mg carbon black) in a 25 mL glass vial. The vial was then capped and ultrasonic processed for 5 minutes. The vial was then heated with magnetic stirring in an oil bath at 165 °C for 24 hrs. Post reaction process was kept the same as above noted typical method.

#### **Synthesis of PtNi<sub>0.55</sub>Co<sub>0.1</sub> octahedra**

10 mg of Pt(acac)<sub>2</sub>, 8 mg of Ni(acac)<sub>2</sub>, 1.5 mg of Co<sub>2</sub>(CO)<sub>8</sub>, 3 mg of Co(acac)<sub>2</sub> and 60 mg of citric acid were added to a 11 mL of carbon black suspended DMF solution (total 35 mg carbon black) in a 25 mL glass vial. The vial was then capped and ultrasonic processed for 5 minutes. The vial was then heated with magnetic stirring in an oil bath at 165 °C for 24 hrs. Post reaction process was kept the same as above noted typical method.

#### **Synthesis of PtNi<sub>0.5</sub>Co<sub>0.15</sub> octahedra**

10 mg of Pt(acac)<sub>2</sub>, 7 mg of Ni(acac)<sub>2</sub>, 1.5 mg of Co<sub>2</sub>(CO)<sub>8</sub>, 6.5 mg of Co(acac)<sub>2</sub> and 60 mg of citric acid were added to a 11 mL of carbon black suspended DMF solution (total 35 mg carbon black) in a 25 mL glass vial. The vial was then capped and ultrasonic processed for 5 minutes. The vial was then heated with magnetic stirring in an oil bath at 165 °C for 24 hrs. Post reaction process was kept the same as above noted typical method.

#### **Synthesis of PtNi<sub>0.65</sub> octahedra**

Pt-Ni octahedra on carbon black was prepared as following conditions: Firstly, 10 mg of Pt(acac)<sub>2</sub>, 10 mg of Ni(acac)<sub>2</sub>, 60 mg of citric acid, 0.5 mg W(CO)<sub>6</sub> were added to a 10 mL of carbon black suspended DMF solution (3.5 mg/mL) in a 25 mL glass vial. The vial was then capped and ultrasonic processed for 5 minutes. Then the vial was heated with magnetic stirring in an oil bath at 165 °C for 24 hrs. After being cooled to room temperature, the carbon supported dispersive Pt-Ni alloy octahedra was obtained by centrifugation and washed with isopropanol/acetone several times to remove the organic impurities and precursor residues. This synthesis yielded octahedra PtNi<sub>0.65</sub>/C, which could be re-dispersed in ethanol for future application.

#### **Characterization**

Transmission electron microscopy (TEM) images were taken on a FEI T12 operated at 120 kV. High resolution TEM images was taken on a FEI TITAN operated at 300 kV. Energy-dispersive X-ray spectroscopy (EDS) mapping and high angle annular dark field (HAADF) scanning transmission electron microscopy (STEM) image was taken on a TitanX operated at 200 kV. Samples for TEM measurements were prepared by dropping 10 μL octahedral Pt-Ni-Co/C ethanol dispersion onto a carbon-

coated copper grids (Ted Pella, Redding, CA) using pipettes and then drying under ambient conditions. Al grid (Ted Pella, Redding, CA) was used for EDS mapping sample preparation. Powder X-ray diffraction patterns (PXRD) were collected on a Panalytical X'Pert Pro X-ray Powder Diffractometer with Cu- $K_{\alpha}$  radiation. The concentration of catalysts was determined by inductively coupled plasma atomic emission spectroscopy (ICP-AES, Shimadzu ICPE-9000) as well as EDS coupled in ZEISS Supra 40VP scanning electron microscope (SEM).

### **Electrode preparation and electrochemistry test**

The catalyst ink was prepared by mixing 1.3 mg of catalyst Pt-Ni-Co/C powder with 2 mL of ethanol solution containing 20  $\mu$ L of Nafion (5 wt%) with 5 min ultrasonication time. Then, 10  $\mu$ L of catalyst ink was dropped onto a 5 mm diameter glassy-carbon electrode (Pine Research Instrumentation) two times, resulting in a total volume of 20  $\mu$ L. Estimation of Pt loading is based on overall Pt ratio within catalyst determined by ICP-AES, and Pt loading is about 1.2  $\mu$ g for all tested Pt based alloy samples. The ink was dried under an infrared lamp, then the electrode was ready for electrochemical test. Commercial Pt/C catalyst was used as the baseline catalysts, and similar procedure as described above was used to conduct the electrochemical measurement. Pt loading is about 1.0  $\mu$ g for commercial Pt/C.

A three-electrode cell was used to carry out the electrochemical measurements. The working electrode was a catalyst coated glassy carbon electrode. Ag/AgCl electrode was used as the reference electrode. Pt wire was used as the counter electrode. Cyclic Voltammetry (CV) measurements was conducted in a  $N_2$  saturated 0.1 M  $HClO_4$  solution between 0.05 to 1.1 V vs. reverse hydrogen electrode (RHE) at a sweep rate of 100 mV/s. Oxygen reduction reaction (ORR) measurements were conducted in an  $O_2$  saturated 0.1 M  $HClO_4$  solution between 0.05 to 1.1 V vs. RHE at a sweep rate of 20 mV/s. Accelerated degradation test (ADT) was performed in oxygen saturated 0.1 M  $HClO_4$  solution by applying cyclic potential sweeps between 0.6 to 1.1 V vs. RHE at a sweep rate of 50 mV/s. For the CO stripping voltammetry measurements, working electrodes coated with different catalysts were firstly immersed in a CO saturated 0.1 M  $HClO_4$  solution for 15 min, and then the CO stripping voltammetry was recorded respectively between 0.3 to 1.1 V vs. RHE at a sweep rate of 5 mV/s.

**Table S1.** Tuning Pt:(Ni+Co) composition ratio of Pt-Ni-Co octahedra by changing Pt:Ni precursor ratio, while fixing Pt:Co precursor ratio.

| Experiment | Precursor Ratio             |                             |                                         |                             |                    | Composition Ratio  |
|------------|-----------------------------|-----------------------------|-----------------------------------------|-----------------------------|--------------------|--------------------|
|            | Pt(acac) <sub>2</sub><br>mg | Ni(acac) <sub>2</sub><br>mg | Co <sub>2</sub> (CO) <sub>8</sub><br>mg | Co(acac) <sub>2</sub><br>mg | Pt:Ni:Co<br>atomic | Pt:Ni:Co<br>atomic |
| (i)        | 10                          | 15                          | 1.5                                     | 0                           | 1:2.30:0.34        | 1:0.9:0.05         |
| (ii)       | 10                          | 9                           | 1.5                                     | 0                           | 1:1.38:0.34        | 1:0.6:0.05         |
| (iii)      | 10                          | 6                           | 1.5                                     | 0                           | 1:0.92:0.34        | 1:0.4:0.05         |

**Table S2.** Tuning Ni:Co composition ratio of Pt-Ni-Co octahedra by replacing part of Ni(acac)<sub>2</sub> with Co(acac)<sub>2</sub>, while fixing Pt:(Ni+Co) ratio within alloy octahedra.

| Experiment | Precursor Ratio             |                             |                                         |                             |                    | Composition Ratio  |
|------------|-----------------------------|-----------------------------|-----------------------------------------|-----------------------------|--------------------|--------------------|
|            | Pt(acac) <sub>2</sub><br>mg | Ni(acac) <sub>2</sub><br>mg | Co <sub>2</sub> (CO) <sub>8</sub><br>mg | Co(acac) <sub>2</sub><br>mg | Pt:Ni:Co<br>atomic | Pt:Ni:Co<br>atomic |
| (ii)       | 10                          | 9                           | 1.5                                     | 0                           | 1:1.38:0.34        | 1:0.6:0.05         |
| (iv)       | 10                          | 8                           | 1.5                                     | 3                           | 1:1.22:0.80        | 1:0.55:0.10        |
| (v)        | 10                          | 7                           | 1.5                                     | 6.5                         | 1:1.07:1.34        | 1:0.5:0.15         |

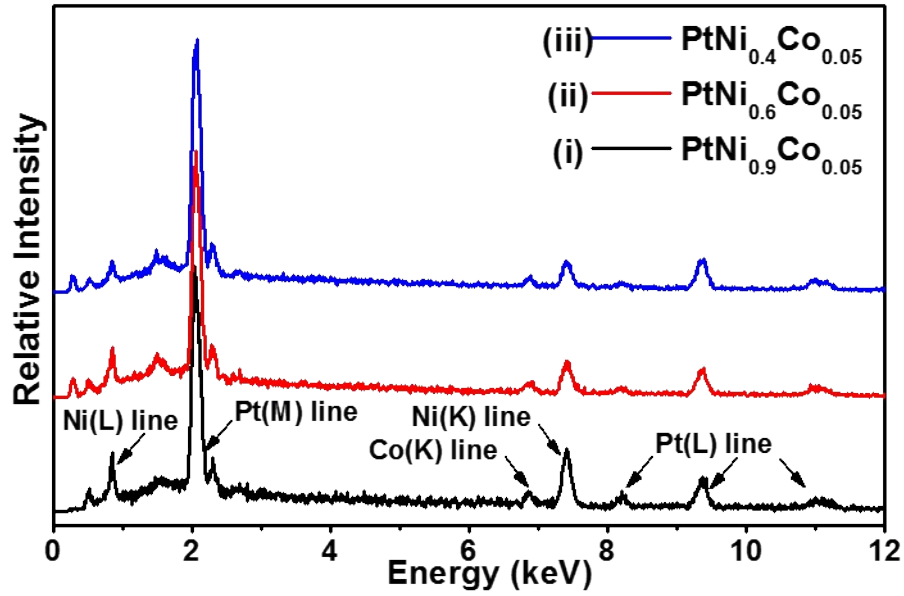

**Fig. S1** EDS spectra of octahedral sample (i)  $\text{PtNi}_{0.9}\text{Co}_{0.05}$ , (ii)  $\text{PtNi}_{0.6}\text{Co}_{0.05}$ , (iii)  $\text{PtNi}_{0.4}\text{Co}_{0.05}$ .

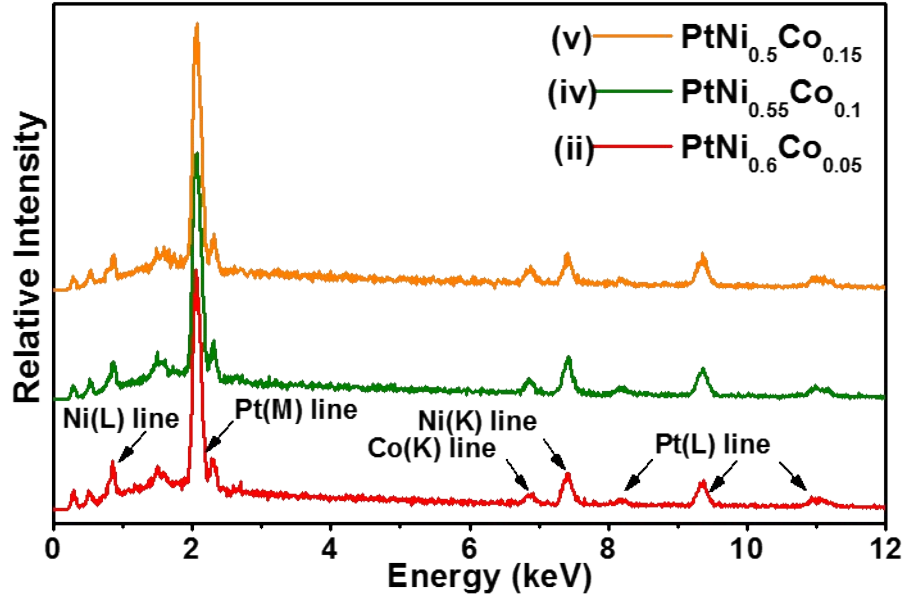

**Fig. S2** EDS spectra of octahedral sample (ii)  $\text{PtNi}_{0.6}\text{Co}_{0.05}$ , (iv)  $\text{PtNi}_{0.55}\text{Co}_{0.1}$ , and (v)  $\text{PtNi}_{0.5}\text{Co}_{0.15}$ .

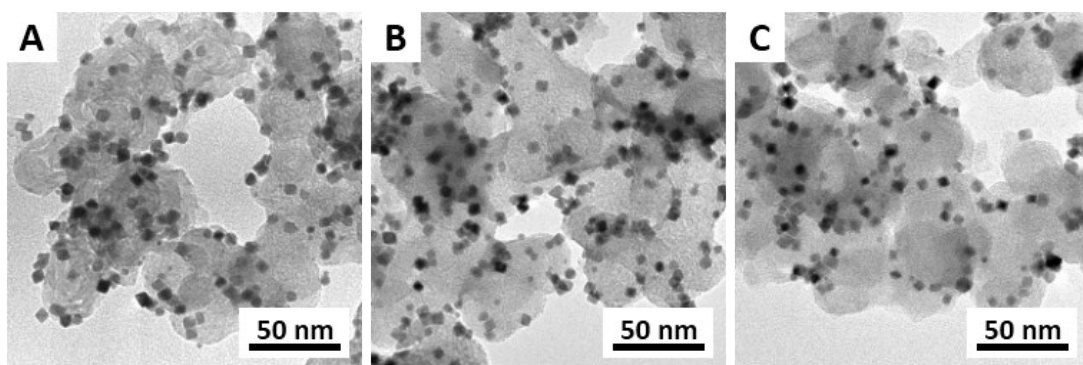

**Fig. S3** TEM images of octahedral sample (A)  $\text{PtNi}_{0.9}\text{Co}_{0.05}$ , (B)  $\text{PtNi}_{0.6}\text{Co}_{0.05}$ , (C)  $\text{PtNi}_{0.4}\text{Co}_{0.05}$

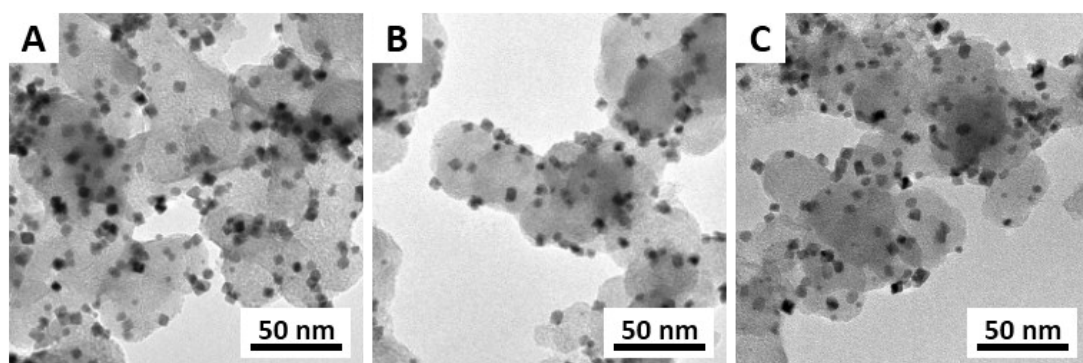

**Fig. S4** TEM images of octahedral sample (A)  $\text{PtNi}_{0.6}\text{Co}_{0.05}$ , (B)  $\text{PtNi}_{0.55}\text{Co}_{0.1}$ , and (C)  $\text{PtNi}_{0.50}\text{Co}_{0.15}$ .

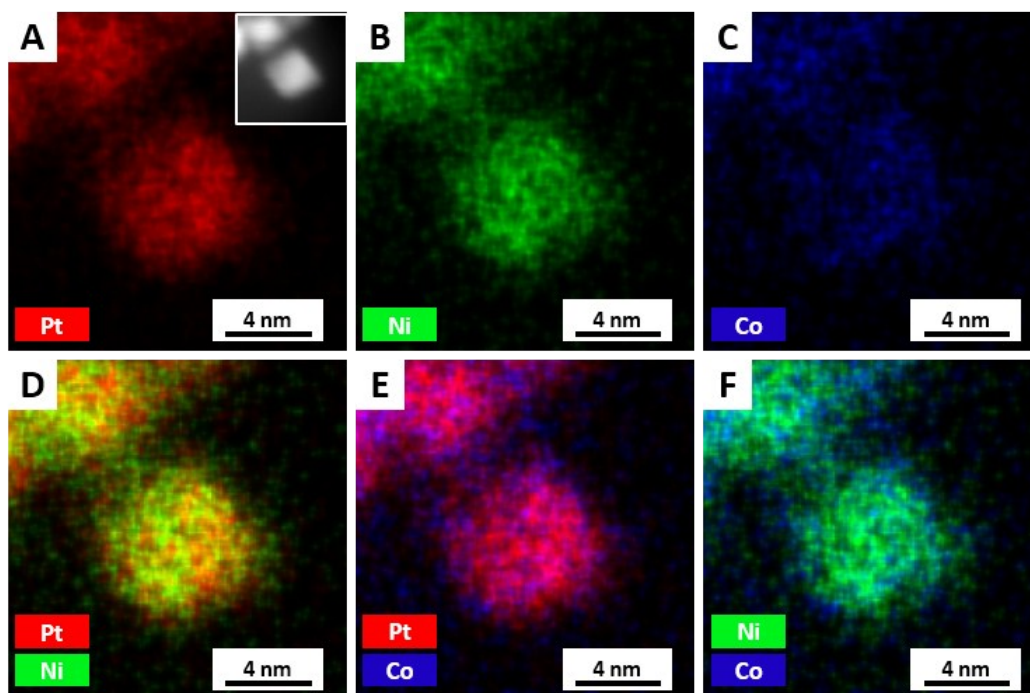

**Fig. S5** Corresponded EDS mapping in Figure 3, EDS mapping only show (A) Pt distribution, insert: STEM of mapping area (B) Ni distribution, (C) Co distribution, (D) Pt, Ni overlap, (E) Pt, Co overlap, (F) Ni, Co overlap.

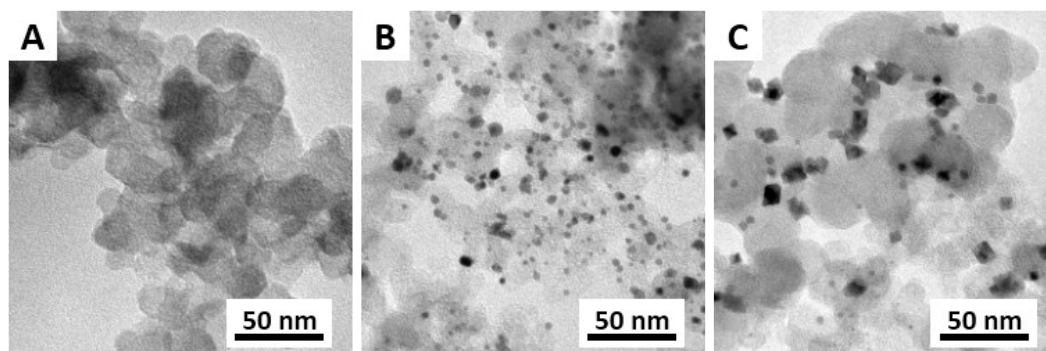

**Fig. S6** TEM images of the products collected from control experiments with the same condition used in the synthesis of octahedral  $\text{PtNi}_{0.55}\text{Co}_{0.1}$  but in the absence of (A)  $\text{Pt}(\text{acac})_2$ , (B)  $\text{Ni}(\text{acac})_2$ , (C)  $\text{Co}(\text{acac})_2$  and  $\text{Co}_2(\text{CO})_8$ .



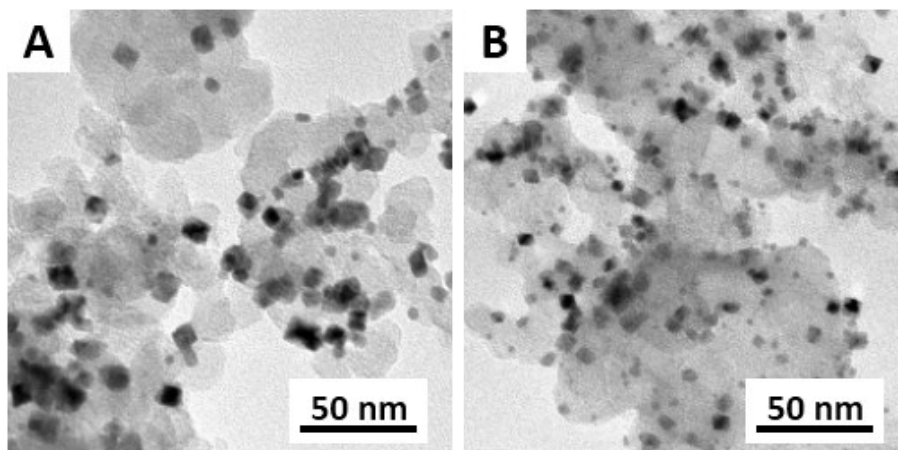

**Fig. S7** TEM images of the products collected from control experiments with the same condition used in the synthesis of octahedral  $\text{PtNi}_{0.55}\text{Co}_{0.1}$  but (A) without  $\text{Co}_2(\text{CO})_8$ , (B) with double amount of  $\text{Co}_2(\text{CO})_8$  (3 mg).

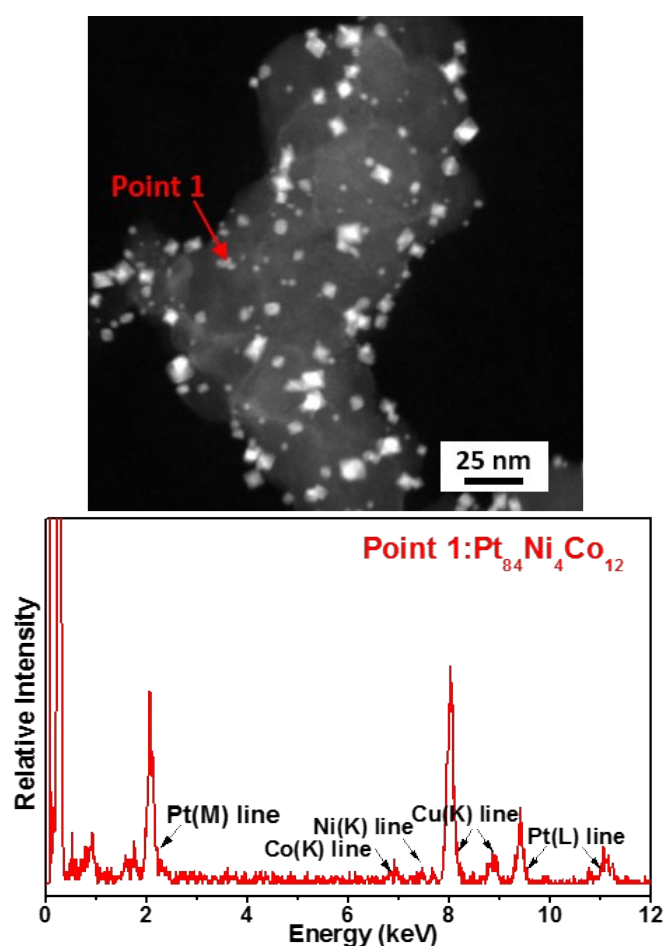

**Fig. S8** STEM image of control experiments showed in Figure S7B, and corresponded point EDS. EDS focused on point 1, which are representative small particles, showed a Pt rich composition around  $\text{Pt}_{84}\text{Ni}_4\text{Co}_{12}$ . The Cu lines showed in EDS were from Cu TEM grid.

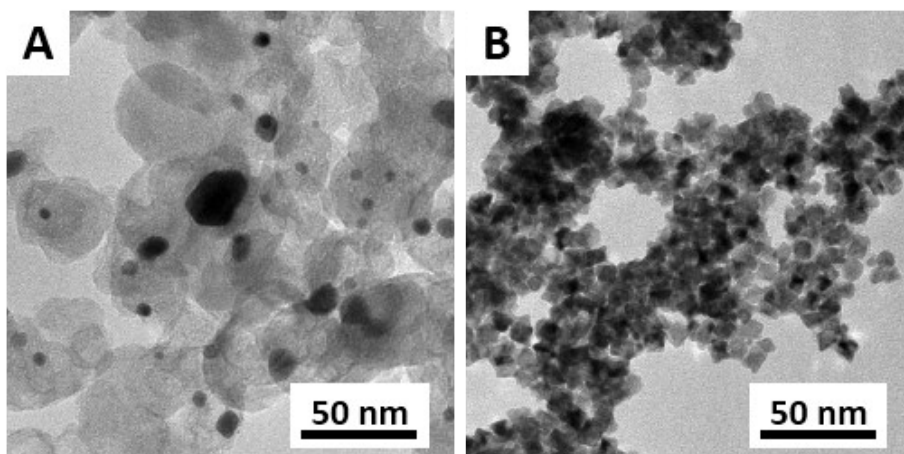

**Fig. S9** TEM images of the products collected from control experiments with the same condition used in the synthesis of octahedral PtNi<sub>0.55</sub>Co<sub>0.1</sub> but in the absence of (A) citric acid, (B) carbon support.

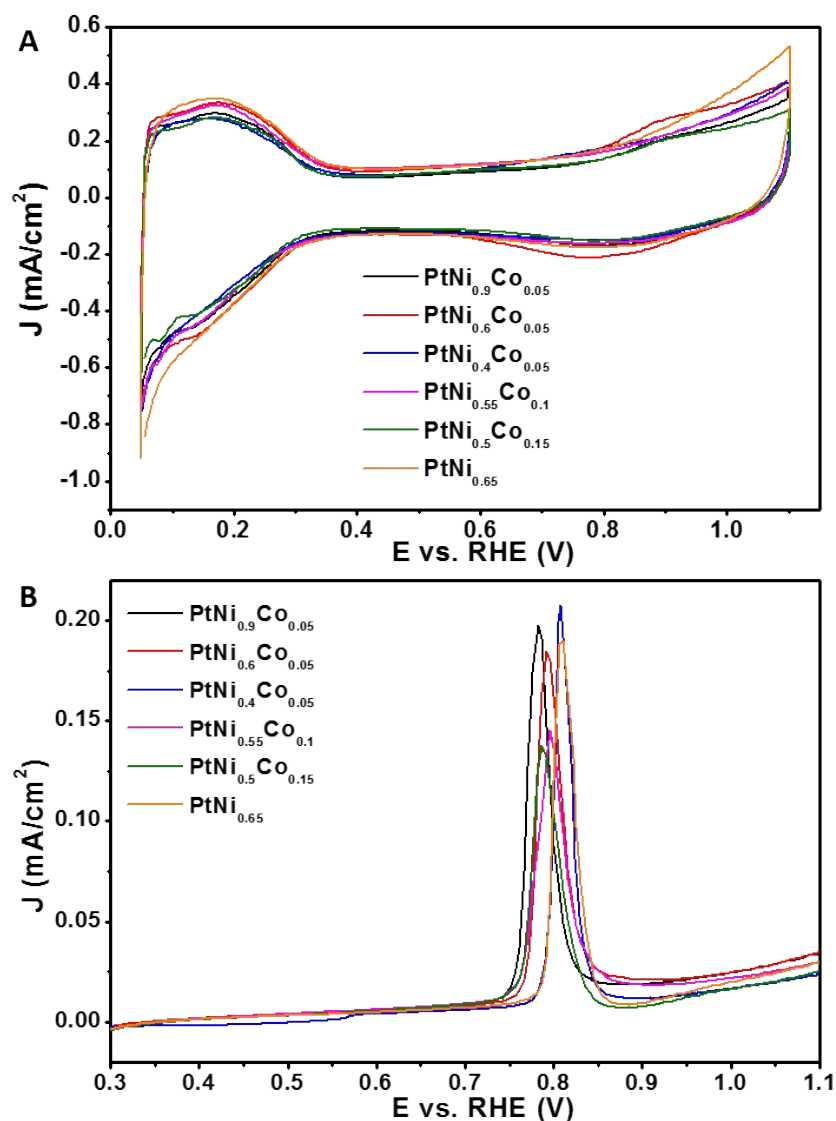

**Fig. S10** (A) CV curves of octahedral (i) PtNi<sub>0.9</sub>Co<sub>0.05</sub>, (ii) PtNi<sub>0.6</sub>Co<sub>0.05</sub>, (iii) PtNi<sub>0.4</sub>Co<sub>0.05</sub>, (iv) PtNi<sub>0.55</sub>Co<sub>0.1</sub>, (v) PtNi<sub>0.5</sub>Co<sub>0.15</sub> and PtNi<sub>0.65</sub> on carbon. The electrochemical active process was carried out in a 0.1 M HClO<sub>4</sub> solution between 0.05 to 1.1 V vs. RHE at a sweep rate of 100 mV/s. (B) CO stripping voltammetric curves of octahedral (i) PtNi<sub>0.9</sub>Co<sub>0.05</sub>, (ii) PtNi<sub>0.6</sub>Co<sub>0.05</sub>, (iii) PtNi<sub>0.4</sub>Co<sub>0.05</sub>, (iv) PtNi<sub>0.55</sub>Co<sub>0.1</sub>, (v) PtNi<sub>0.5</sub>Co<sub>0.15</sub> and PtNi<sub>0.65</sub> on carbon. CO stripping voltammetry measurements were conducted in a 0.1 M HClO<sub>4</sub> solution between 0.3 to 1.1 V vs. RHE at a sweep rate of 5 mV/s.

**Table S3.** Integrated charge ratio based on CO stripping results and hydrogen underpotential deposition ( $H_{\text{upd}}$ ). Electrochemical active surface area (ECSA) based on CO stripping is calculated by integration of CO stripping peak with a conversion constant of  $420 \mu\text{C}/\text{cm}^2$ . ECSA based on  $H_{\text{upd}}$  is calculated by integration from 0.05 to 0.35 V vs. RHE with a conversion constant of  $210 \mu\text{C}/\text{cm}^2$ .  $Q_{\text{CO}} / 2Q_{\text{H}}$  represents electrochemical surface area difference estimated by CO stripping and  $H_{\text{upd}}$  ( $Q$  represents the integrated charge).

| Sample                                       | $Q_{\text{CO}} / 2Q_{\text{H}}$ |
|----------------------------------------------|---------------------------------|
| (i) PtNi <sub>0.9</sub> Co <sub>0.05</sub>   | 1.24                            |
| (ii) PtNi <sub>0.6</sub> Co <sub>0.05</sub>  | 1.21                            |
| (iii) PtNi <sub>0.4</sub> Co <sub>0.05</sub> | 1.21                            |
| (iv) PtNi <sub>0.55</sub> Co <sub>0.1</sub>  | 1.19                            |
| (v) PtNi <sub>0.5</sub> Co <sub>0.15</sub>   | 1.19                            |
| PtNi <sub>0.65</sub>                         | 1.17                            |

**Table S4.** Performance comparison between the as-prepared Pt-Ni-Co catalysts and several published Pt-Ni-Co catalysts.

| Catalyst   |                                                                                                  |            | Specific activity (mA/cm <sup>2</sup> ) |                       | Mass activity (A/mg <sub>Pt</sub> ) |
|------------|--------------------------------------------------------------------------------------------------|------------|-----------------------------------------|-----------------------|-------------------------------------|
|            |                                                                                                  |            | Based on H <sub>upd</sub>               | Based on CO stripping |                                     |
| This paper | Pt <sub>51</sub> Ni <sub>46</sub> Co <sub>3</sub><br>(PtNi <sub>0.9</sub> Co <sub>0.05</sub> /C) | octahedral | 4.37                                    | 3.52                  | 1.97                                |
| This paper | Pt <sub>61</sub> Ni <sub>36</sub> Co <sub>3</sub><br>(PtNi <sub>0.6</sub> Co <sub>0.05</sub> /C) | octahedral | 5.50                                    | 4.54                  | 2.49                                |
| This paper | Pt <sub>69</sub> Ni <sub>28</sub> Co <sub>3</sub><br>(PtNi <sub>0.4</sub> Co <sub>0.05</sub> /C) | octahedral | 4.85                                    | 4.01                  | 2.17                                |
| This paper | Pt <sub>61</sub> Ni <sub>33</sub> Co <sub>6</sub><br>(PtNi <sub>0.55</sub> Co <sub>0.1</sub> /C) | octahedral | 6.01                                    | 5.05                  | 2.80                                |
| This paper | Pt <sub>61</sub> Ni <sub>30</sub> Co <sub>9</sub><br>(PtNi <sub>0.5</sub> Co <sub>0.15</sub> /C) | octahedral | 4.22                                    | 3.54                  | 1.96                                |
| Ref. 25    | Pt <sub>71</sub> Ni <sub>25</sub> Co <sub>4</sub> /C                                             | octahedral | 3.88                                    | NA                    | 2.33                                |
| Ref. 26    | Pt <sub>48</sub> Ni <sub>27</sub> Co <sub>25</sub> /C                                            | octahedral | 3.5*                                    | NA                    | 0.45*                               |
| Ref. 26    | Pt <sub>30</sub> Ni <sub>51</sub> Co <sub>19</sub> /C                                            | octahedral | 1.5*                                    | NA                    | 0.50*                               |
| Ref. 18    | Pt <sub>36</sub> Ni <sub>15</sub> Co <sub>49</sub> /C                                            | spherical  | 1.85                                    | NA                    | 0.88                                |

(NA: not available; \*: extracted from plot in literature)

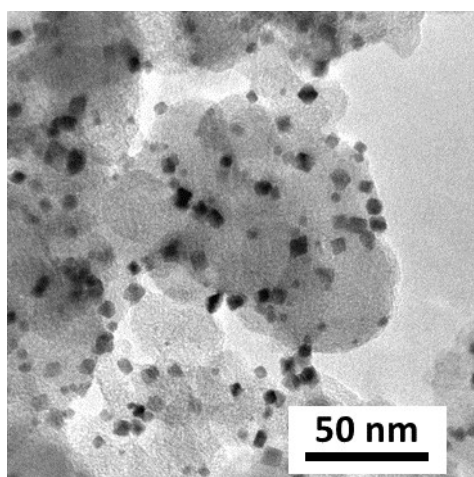

**Fig. S11** TEM image of octahedral PtNi<sub>0.65</sub>/C nano catalyst.

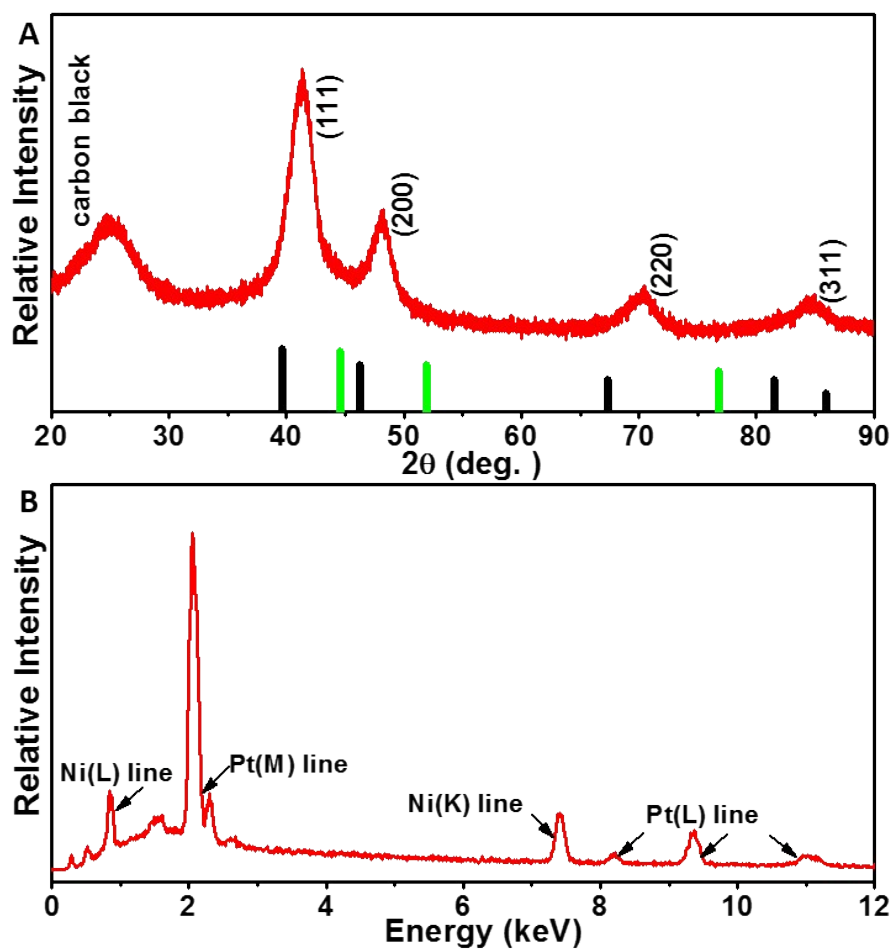

**Fig. S12** (A) XRD of sample octahedral  $\text{PtNi}_{0.65}/\text{C}$ , black and green perpendicular lines represent standard Pt and Ni peak position, respectively. (B) EDS of sample octahedral  $\text{PtNi}_{0.65}/\text{C}$ .

**Table S5.** Stability comparison of our octahedral PtNi<sub>0.55</sub>Co<sub>0.1</sub>/C and several Pt-Ni and Pt-Ni-Co catalyst in literature. Comparison was made regarding specific activity (SA) and mass activity (MA) at 0.9 V vs. RHE.

| Reference | Octahedral Catalyst                                                                            | Potential Range vs. RHE     | Purging Gas    | ADT Cycles | Initial SA (mA/cm <sup>2</sup> ) | Decrease Ratio | Initial MA (mA/μgPt) | Decrease Ratio |
|-----------|------------------------------------------------------------------------------------------------|-----------------------------|----------------|------------|----------------------------------|----------------|----------------------|----------------|
| Ref. 14   | Pt <sub>2.5</sub> Ni                                                                           | 0.65-1.0 V<br>(square wave) | O <sub>2</sub> | 5000       | NA                               | NA             | 3.3                  | 40%            |
| Ref. 15   | Pt <sub>1.5</sub> Ni                                                                           | 0.6-1.0 V                   | NA             | 4000       | 3.3*                             | 50%*           | 1.2*                 | 16%            |
| Ref. 15   | PtNi                                                                                           | 0.6-1.0 V                   | NA             | 4000       | 3.8*                             | 66%*           | 1.7*                 | 66%            |
| Ref. 15   | PtNi <sub>1.5</sub>                                                                            | 0.6-1.0 V                   | NA             | 4000       | 2.9*                             | 45%*           | 1.0*                 | 45%            |
| Ref. 26   | Pt <sub>71</sub> Ni <sub>25</sub> Co <sub>4</sub>                                              | 0.6-1.1 V                   | O <sub>2</sub> | 6000       | 3.88                             | NA             | 2.33                 | 57%            |
| Ref. 27   | Pt <sub>48</sub> Ni <sub>27</sub> Co <sub>25</sub>                                             | 0.5-1.0 V                   | N <sub>2</sub> | 4000       | 3.5*                             | 51%            | 0.45*                | 51%            |
| Ref. 27   | Pt <sub>30</sub> Ni <sub>51</sub> Co <sub>19</sub>                                             | 0.5-1.0 V                   | N <sub>2</sub> | 4000       | 1.5*                             | 34%            | 0.50*                | 47%            |
| This work | Pt <sub>61</sub> Ni <sub>33</sub> Co <sub>6</sub><br>(PtNi <sub>0.55</sub> Co <sub>0.1</sub> ) | 0.6-1.1 V                   | O <sub>2</sub> | 6000       | 5.05                             | 58%            | 2.80                 | 51%            |

(NA: not available; \*: extracted from plot in literature)



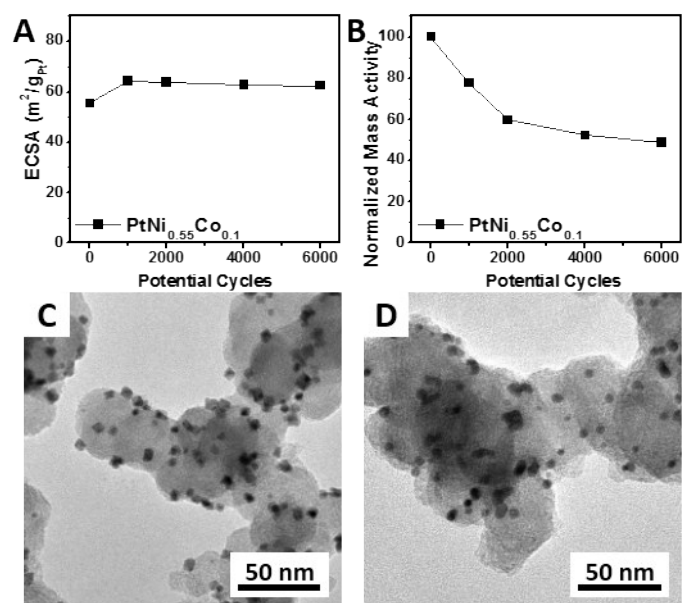

**Fig. S13** ADT test of octahedral PtNi<sub>0.55</sub>Co<sub>0.1</sub>/C (A) ECSA changing trend, (B) Normalized mass activity changing trend. (C) TEM of octahedral PtNi<sub>0.55</sub>Co<sub>0.1</sub>/C before ADT test, (D) TEM of octahedral PtNi<sub>0.55</sub>Co<sub>0.1</sub>/C after ADT test.
